# Supplementary material
Source: publisher site journal article supplement (https://www.dovepress.com/article/337495)
Supplement: Supplementary file 1 [file get_supplementary_file.php]

**DATA INCLUDED IN SUPPLEMENT**

**Supplemental Table 1.** Healthcare utilization during the year post CLL diagnosis compared with the year prior, excluding patients starting treatment within one year after CLL diagnosis

**Supplemental Table 2.** Healthcare utilization the year post CLL diagnosis for patients with specific comorbidities

**Supplemental Table 1.** Healthcare utilization during the first year post CLL diagnosis compared with the year prior to CLL diagnosis for the same patients stratified by the number of comorbidities, excluding patients starting treatment within one year after CLL diagnosis.

|  | No comorbidities | | | 1 comorbidity | | | ≥2 comorbidity | | |
| --- | --- | --- | --- | --- | --- | --- | --- | --- | --- |
|  | Percent utilizing | | OR (95% CI) | Percent utilizing | | OR (95% CI) | Percent utilizing | | OR (95% CI) |
|  | Prior | Post | Post vs. Prior | Prior | Post | Post vs. Prior | Prior | Post | Post vs. Prior |
| ≥6 bed days | 6 | 19 | 3.80(3.32-4.34) | 16 | 29 | 2.09(1.79-2.44) | 29 | 36 | 1.35(1.12-1.63) |
| Emergency room | 9 | 13 | 1.48(1.31-1.68) | 14 | 18 | 1.35(1.14-1.60) | 23 | 24 | 1.07(0.87-1.32) |
| Hospitalizations | 13 | 31 | 3.00(2.72-3.31) | 26 | 43 | 2.12(1.85-2.43) | 40 | 53 | 1.73(1.45-2.06) |
| ≥5 out-patient clinic visits | 10 | 47 | 7.81(7.04-8.66) | 20 | 51 | 4.24(3.68-4.88) | 31 | 57 | 2.86(2.38-3.42) |

| **Supplemental Table 2**. Healthcare utilization the first year post CLL diagnosis for patients with specific comorbidities compared with patients without the same conditions | | | | | | | | | |
| --- | --- | --- | --- | --- | --- | --- | --- | --- | --- |
|  | Cerebrovascular disease | | | |  | Chronic pulmonary disease | | | |
|  | No | Yes | Yes. vs. No | |  | No | Yes | Yes. vs. No | |
|  | Percent utilizing | | Unadjusted OR (95% CI) | Adjusted OR (95% CI) |  | Percent utilizing | | Unadjusted OR (95% CI) | Adjusted OR (95% CI) |
| Hospitalizations | 38 | 52 | 1.77(1.53-2.05) | 1.25(1.07-1.47) |  | 38 | 50 | 1.64(1.41-1.91) | 1.19(1.01-1.41) |
| Emergency room | 15 | 23 | 1.69(1.41-2.01) | 1.21(1.00-1.48) |  | 15 | 23 | 1.67(1.39-2.01) | 1.23(1.01-1.51) |
| ≥5 out-patient clinic visits | 52 | 53 | 1.07(0.93-1.24) | 0.98(0.83-1.15) |  | 52 | 55 | 1.13(0.97-1.32) | 1.01(0.86-1.20) |
| ≥6 prescription drugs | 48 | 73 | 2.97 (2.52-3.50) | 1.45 (1.21-1.75) |  | 48 | 78 | 3.81 (3.18-4.57) | 2.04 (1.67-2.49) |
| ≥5 bed days | 25 | 35 | 1.55(1.33-1.81) | 1.09(0.92-1.30) |  | 25 | 34 | 1.68(1.43-1.97) | 1.27(1.07-1.52) |
|  |  |  |  |  |  |  |  |  |  |
|  | Congestive heart disease or MI | | | |  | Diabetes | | | |
|  | No | Yes | Yes. vs. No | |  | No | Yes | Yes. vs. No | |
|  | Percent utilizing | | Unadjusted OR (95% CI) | Adjusted OR (95% CI) |  | Percent utilizing | | Unadjusted OR (95% CI) | Adjusted OR (95% CI) |
| Hospitalizations | 37 | 54 | 2.00(1.74-2.29) | 1.29(1.10-1.51) |  | 38 | 48 | 1.47(1.27-1.71) | 1.10(0.93-1.30) |
| Emergency room | 15 | 23 | 1.75(1.48-2.06) | 1.22(1.01-1.48) |  | 15 | 20 | 1.41(1.17-1.70) | 1.01(0.82-1.25) |
| ≥5 out-patient clinic visits | 51 | 58 | 1.32(1.15-1.52) | 1.17(1.00-1.36) |  | 51 | 60 | 1.43(1.23-1.66) | 1.37(1.16-1.61) |
| ≥6 prescription drugs | 47 | 84 | 5.83 (4.87-6.98) | 3.10 (2.54-3.77) |  | 47 | 82 | 5.10 (4.21-6.17) | 3.12 (2.53-3.84) |
| ≥5 bed days | 25 | 34 | 1.85(1.60-2.14) | 1.21(1.02-1.43) |  | 24 | 37 | 1.60(1.37-1.88) | 1.28(1.07-1.53) |
| **Adjusted for age, sex, calendar year, and multimorbidity* | | | |  |  |  |  |  |  |
